# Supplementary material for: The dual function of impurity in protein crystallization
Source: Royal Society of Chemistry journal article supplement (doi:10.1039/d1ce01535d), 2021-12-13
Supplement: d1ce01535d1.pdf [file d1ce01535d1.pdf]

## The dual function of impurity on protein crystallization

Jie Liu, Chen-Yan Zhang\*, Yue Liu, Xiang-Long Wu, Tuo-Di Zhang, Feng-Zhu Zhao,  
Liang-Liang Chen, Xiao-Qian Jin, Jin-Liang He, Da-Chuan Yin\*

*Institute for Special Environmental Biophysics, Key Laboratory for Space Bioscience  
and Biotechnology, School of Life Sciences, Northwestern Polytechnical University,  
Xi'an 710072, Shaanxi, PR China*

---

The authors declare no conflict of interest.

\* To whom correspondence may be addressed.

Chen-Yan Zhang, zhangchenyan@nwpu.edu.cn, Tel: 86-29-88460543, Fax: 86-29-  
88460543; Da-Chuan Yin, yindc@nwpu.edu.cn, Tel: 86-29-88460254, Fax: 86-29-  
88460254.

## Supporting Information

| SI Figures |                                                                                                                                                |    |
|------------|------------------------------------------------------------------------------------------------------------------------------------------------|----|
| SI 1       | <b>Figure S1.</b> The SDS-PAGE results of crystals and crystallization solution supernatant.                                                   | P1 |
| SI 2       | <b>Figure S2.</b> Images of concanavalin crystallization droplets.                                                                             | P2 |
| SI 3       | <b>Figure S3.</b> Comparison of lysozyme and catalase hits using different impurities.                                                         | P3 |
| SI 4       | <b>Figure S4.</b> Comparison of crystallization reproducibility of lysozyme and catalase with additional of impurities with and without sound. | P4 |
| SI 5       | <b>Figure S5.</b> Comparison of lysozyme and catalase hits with additional of impurities with and without sound.                               | P5 |
| SI 6       | <b>Figure S6.</b> Comparison of the crystallization success rate of lysozyme under different sound intensities.                                | P6 |

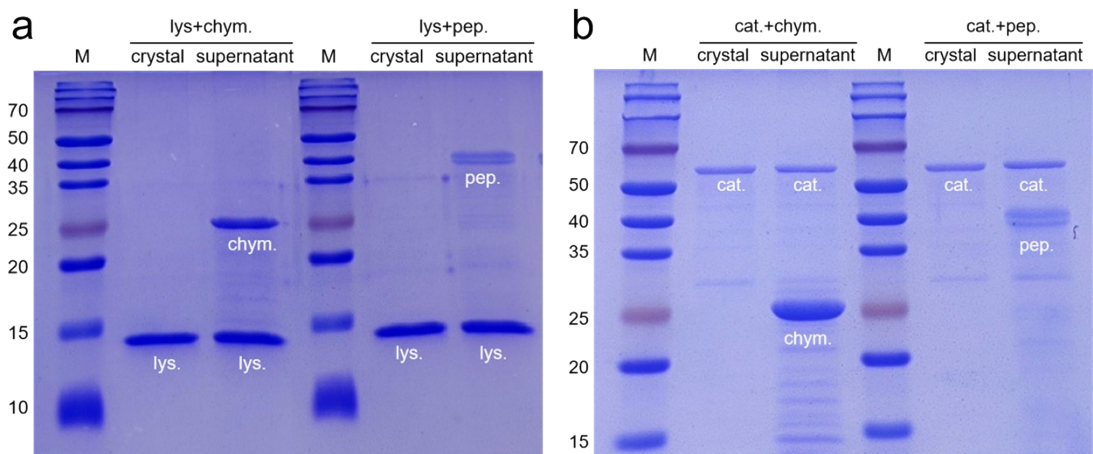

**Figure S1.** The SDS-PAGE results of crystals and crystallization solution supernatant. (a) 20 mg/ml lysozyme crystallization solution with 10 mg/ml impurities ( $\alpha$ -chymotrypsinogen A and pepsin) (b) 8 mg/ml catalase crystallization solution with 4 mg/ml impurities ( $\alpha$ -chymotrypsinogen A and pepsin).

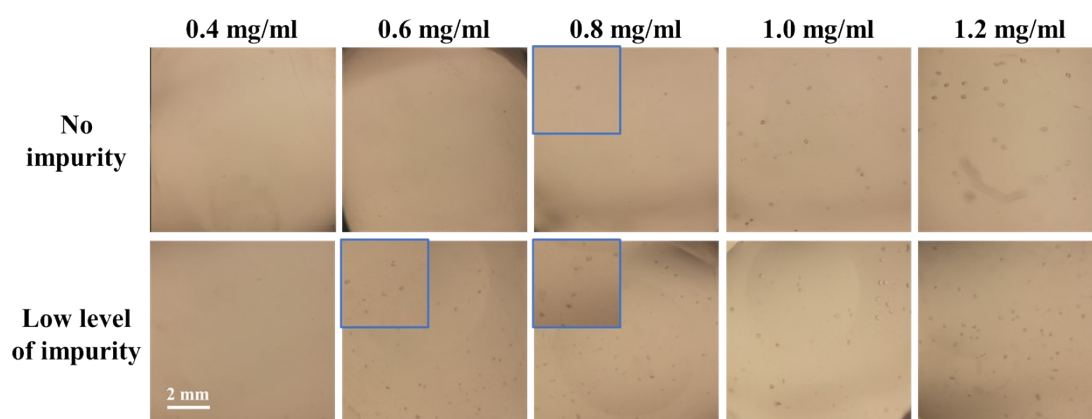

**Figure S2.** Images of concanavalin crystallization droplets. The concentration of concanavalin was 0.2 mg/ml ~ 1.2 mg/ml.  $\alpha$ -chymotrypsinogen A was used as an impurity.

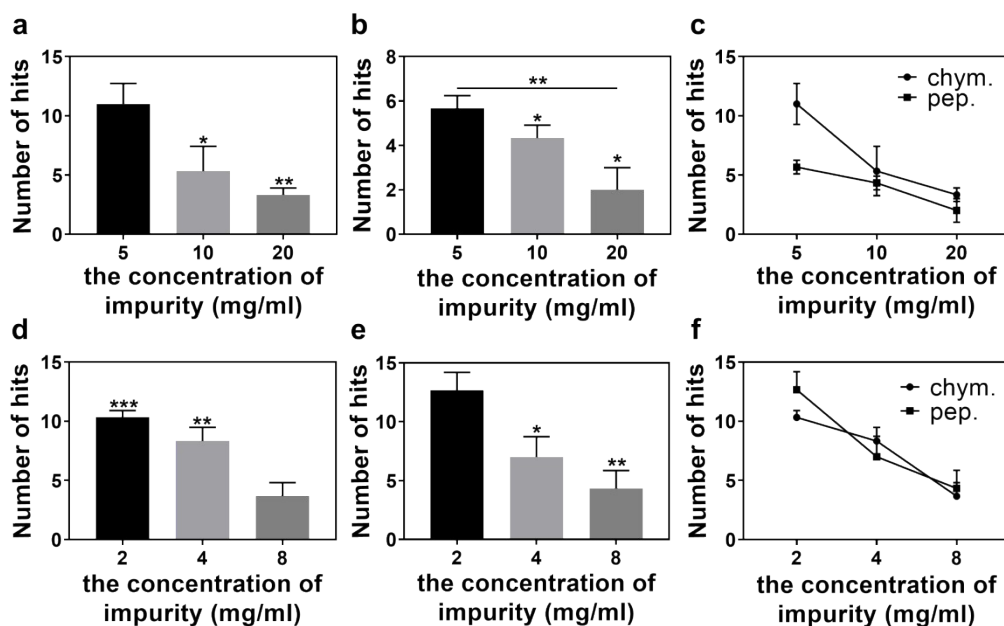

**Figure S3.** Comparison of lysozyme and catalase hits using different impurities. (a) 20 mg/ml lysozyme with  $\alpha$ -chymotrypsinogen A as impurity (5 mg/ml, 10 mg/ml, and 20 mg/ml); (b) 20 mg/ml lysozyme with pepsin as impurity (5 mg/ml, 10 mg/ml, and 20 mg/ml); (c) comparison of effect of impurities on lysozyme hits; (d) 8 mg/ml catalase with  $\alpha$ -chymotrypsinogen A as impurity (2 mg/ml, 4 mg/ml, and 8 mg/ml); (e) 8 mg/ml catalase with pepsin as impurity (2 mg/ml, 4 mg/ml, and 8 mg/ml); (f) comparison of effect of impurities on catalase hits.  $p < 0.05$  indicated by \*,  $p < 0.01$  indicated by \*\*, and  $p < 0.001$  indicated by \*\*\*.

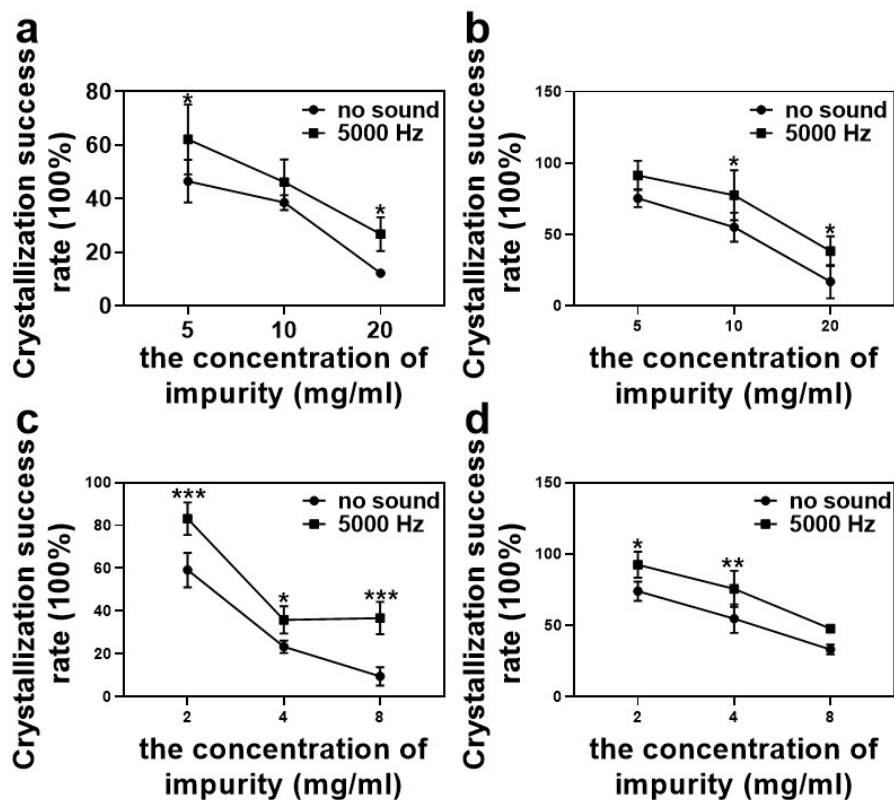

**Figure S4.** Comparison of crystallization reproducibility of lysozyme and catalase with additional of impurities with and without sound. (a) 20 mg/ml lysozyme,  $\alpha$ -chymotrypsinogen A was impurity (its concentration was 5 mg/ml, 10 mg/ml and 20 mg/ml); (b) 20 mg/ml lysozyme, pepsin was impurity (its concentration was 5 mg/ml, 10 mg/ml and 20 mg/ml); (c) 8 mg/ml catalase,  $\alpha$ -chymotrypsinogen A was impurity (its concentration was 2 mg/ml, 4 mg/ml and 8 mg/ml); (d) 8 mg/ml catalase, pepsin was impurity (its concentration was 2 mg/ml, 4 mg/ml and 8 mg/ml).  $p < 0.05$  indicated by \*,  $p < 0.01$  indicated by \*\*, and  $p < 0.001$  indicated by \*\*\*.

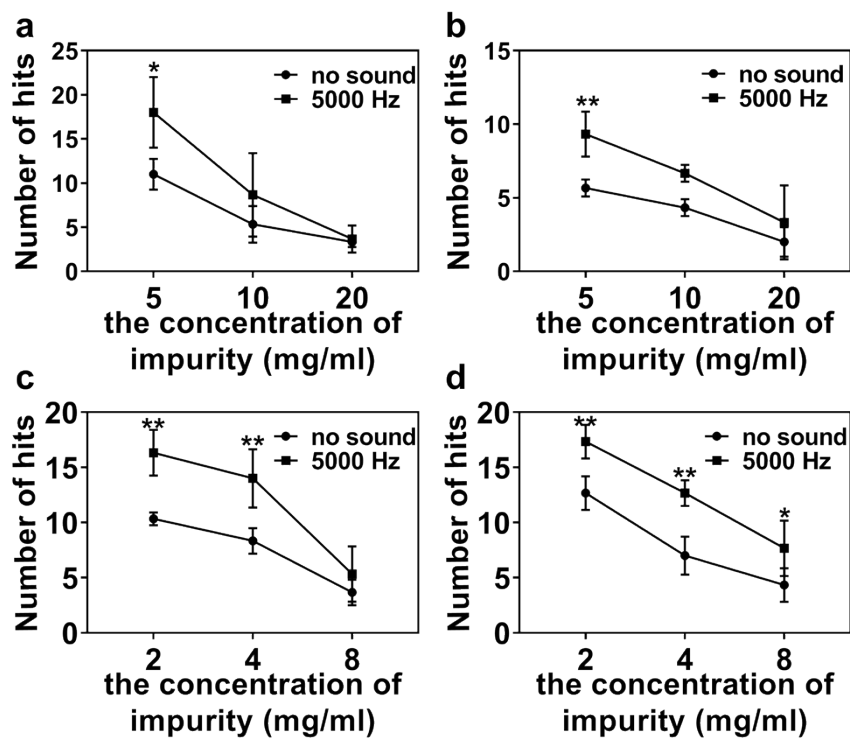

**Figure S5.** Comparison of lysozyme and catalase hits with additional of impurities with and without sound. (a) 20 mg/ml lysozyme,  $\alpha$ -chymotrypsinogen A was impurity (its concentration was 5 mg/ml, 10 mg/ml and 20 mg/ml); (b) 20 mg/ml lysozyme, pepsin was impurity (its concentration was 5 mg/ml, 10 mg/ml and 20 mg/ml); (c) 8 mg/ml catalase,  $\alpha$ -chymotrypsinogen A was impurity (its concentration was 2 mg/ml, 4 mg/ml and 8 mg/ml); (d) 8 mg/ml catalase, pepsin was impurity (its concentration was 2 mg/ml, 4 mg/ml and 8 mg/ml).  $p < 0.05$  indicated by \*,  $p < 0.01$  indicated by \*\*.

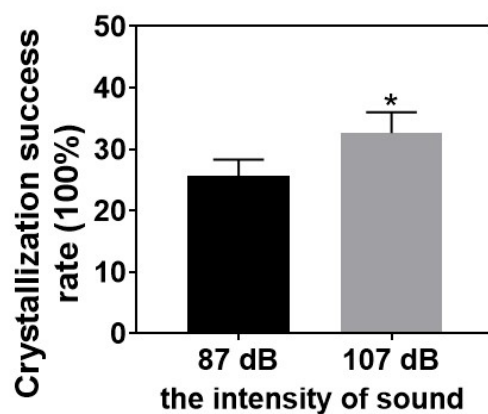

**Figure S6.** Comparison of the crystallization success rate of lysozyme under different sound intensities. Lysozyme concentration was 20 mg/ml, 20 mg/ml  $\alpha$ -chymotrypsinogen A was used as impurities, 80 mg/ml NaCl was crystallization reagent. 5000 Hz audible sound was applied during all the crystallization processes, and the intensity was 87 dB and 107 dB, respectively.  $p < 0.05$  indicated by \*.
